# Supplementary material for: Three-dimensional metal phosphonodicarboxylates with GIS-zeolite topology: syntheses, structures and magnetic studies
Source: Royal Society of Chemistry journal article supplement (doi:10.1039/c0dt00601g), 2010-01-01
Supplement: c0dt00601g.pdf [file c0dt00601g.pdf]

### Supporting information

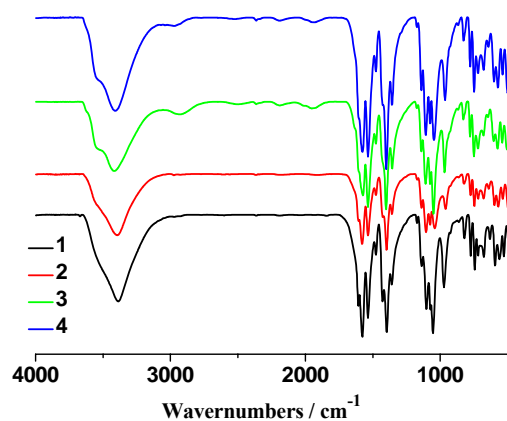

Figure S1. IR spectra for compounds 1–4.

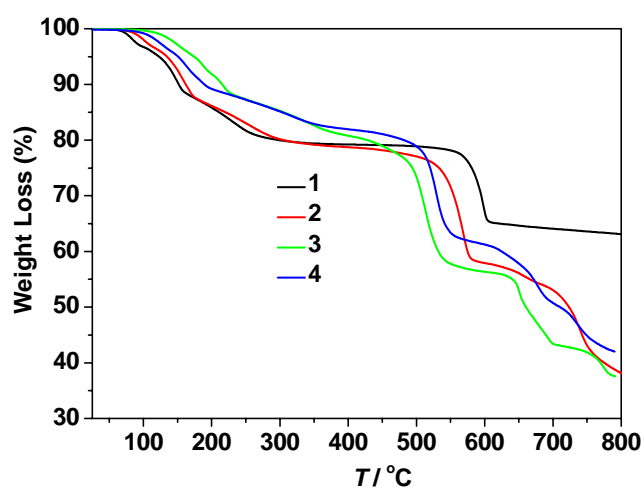

Figure S2. The TGA curves of compounds 1–4.

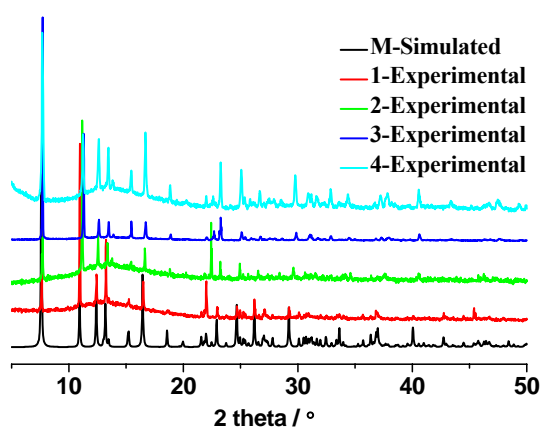

Figure S3. The XRD patterns of compounds 1–4.

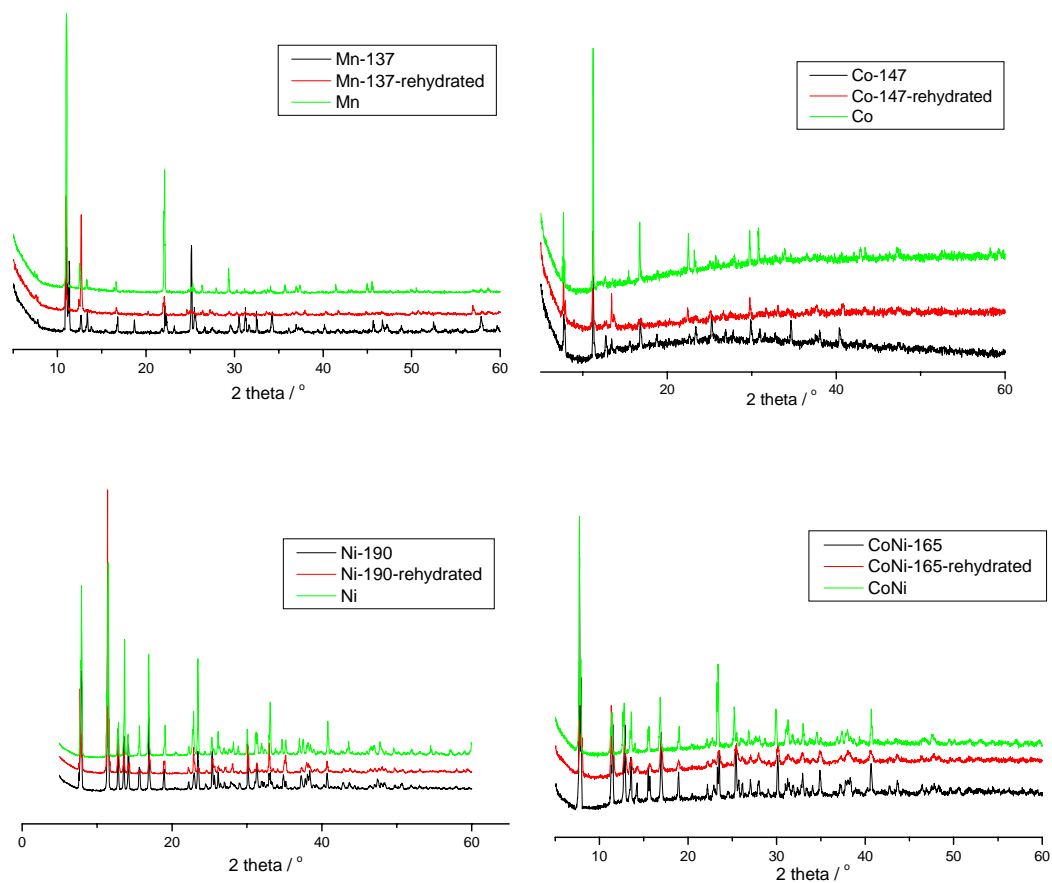

**Figure S4.** XRD patterns for compounds **1-4** before and after the removal of lattice water at certain temperatures (**1**: 137°C, **2**: 147°C, **3**: 190°C, **4**: 165°C) and the corresponding re-hydrated products.

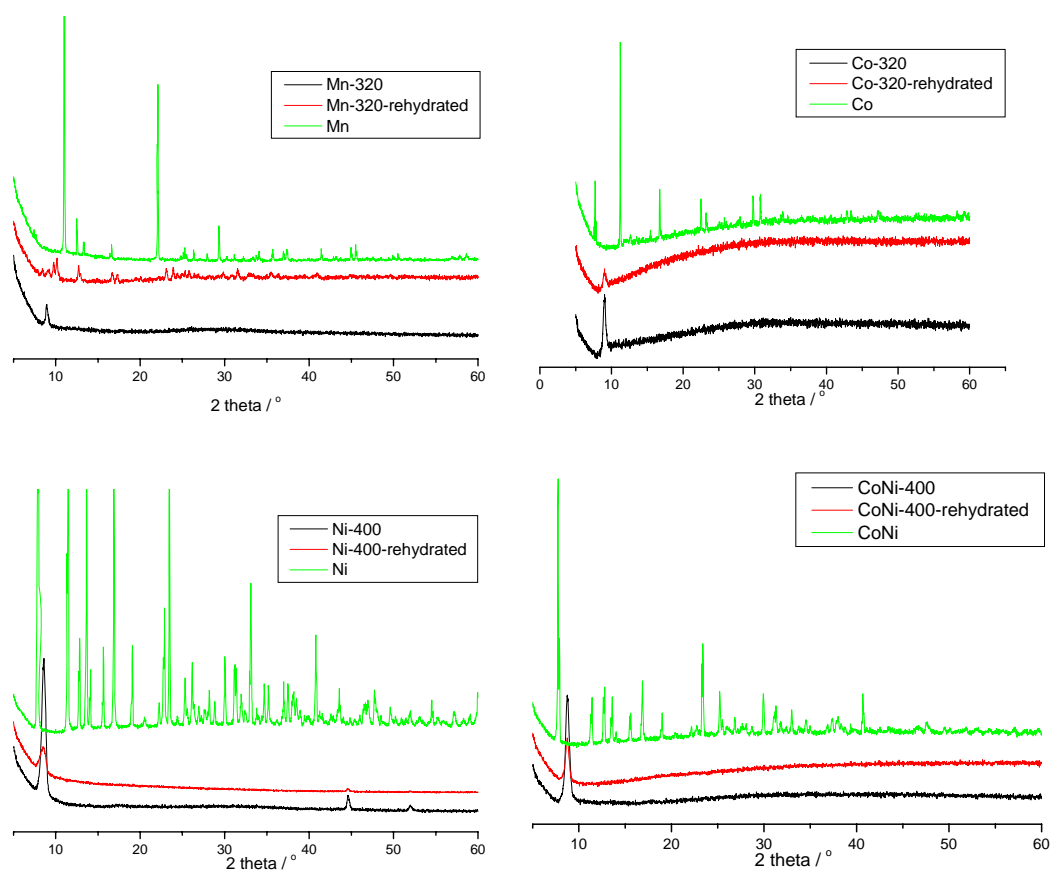

**Figure S5.** XRD patterns for compounds **1-4** before and after the removal of both lattice and coordination water at certain temperatures (**1**: 320°C, **2**: 320°C, **3**: 400°C, **4**: 400°C) and the corresponding re-hydrated products.

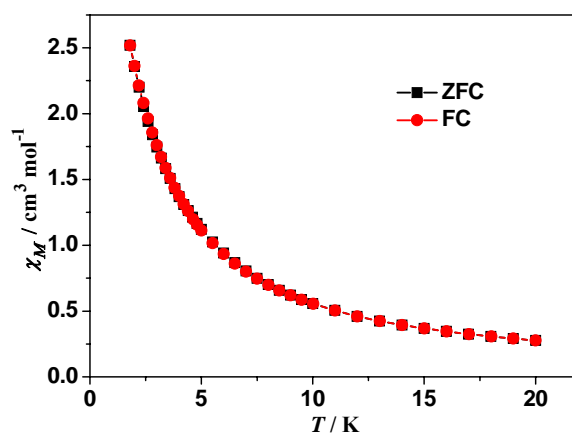

**Figure S6.** Zero field cooled (ZFC) and field cooled (FC) magnetization versus T measures at 10 Oe for **2**.

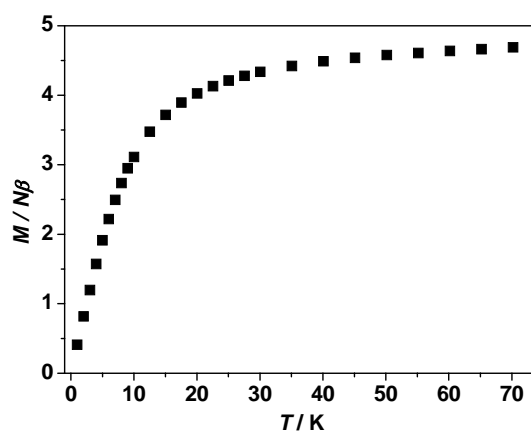

**Figure S7.** Magnetization of **2** at 1.8 K.

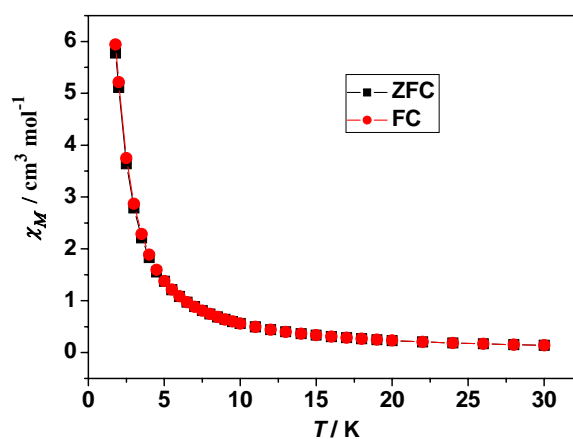

**Figure S8.** Zero field cooled (ZFC) and field cooled (FC) magnetization versus T measures at 10 Oe for **3**.

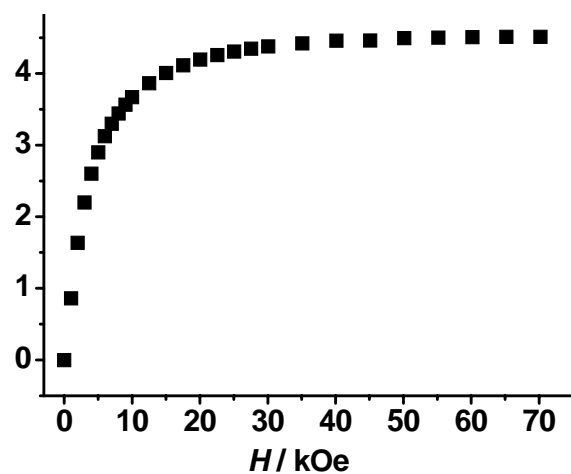

**Figure S9.** Magnetization of **3** at 1.8 K.

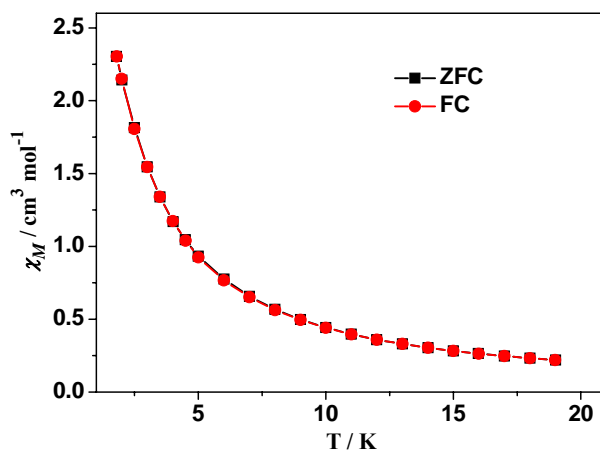

**Figure S10.** Zero field cooled (ZFC) and field cooled (FC) magnetization versus T measures at 10 Oe for **4**.

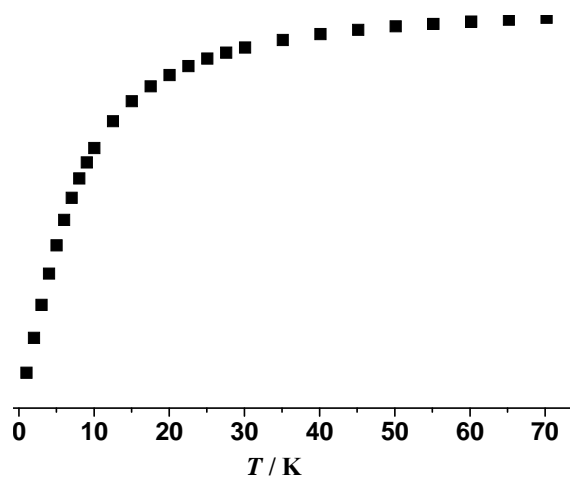

**Figure S11.** Magnetization of **4** at 1.8 K.
